# Supplementary material
Source: PubMed Central journal article supplement (PMC4245165)
Supplement: cb5005383_si_001.pdf [file cb5005383_si_001.pdf]

## **Uncovering caffeine's adenosine A<sub>2A</sub> receptor inverse agonism in experimental parkinsonism**

Víctor Fernández-Dueñas<sup>1</sup>, Maricel Gómez-Soler<sup>1</sup>, Marc López-Cano<sup>1</sup>, Jaume J. Taura<sup>1</sup>, Catherine Ledent<sup>2</sup>, Masahiko Watanabe<sup>3</sup>, Kenneth A. Jacobson<sup>4</sup>, Jean-Pierre Vilardaga<sup>5,\*</sup> & Francisco Ciruela<sup>1,\*</sup>

<sup>1</sup>*Unitat de Farmacologia, Departament Patologia i Terapèutica Experimental, Facultat de Medicina, IDIBELL-Universitat de Barcelona, L'Hospitalet de Llobregat, 08907 Barcelona, Spain;* <sup>2</sup>*IRIBHM, Université Libre de Bruxelles, Brussels, Belgium;* <sup>3</sup>*Department of Anatomy, Hokkaido University School of Medicine, Sapporo, Japan;* <sup>4</sup>*Molecular Recognition Section, Laboratory of Bioorganic Chemistry, National Institute of Diabetes and Digestive and Kidney Diseases, National Institutes of Health, 20892 Bethesda, MD, USA;* <sup>5</sup>*Laboratory for G Protein-Coupled Receptor Biology, Department of Pharmacology and Chemical Biology, University of Pittsburgh School of Medicine, Pittsburgh PA 15261, USA.*

## Contents

### Supplemental Figures

- Figure S1. Dose-dependent effects of caffeine and ZM241385 in reducing cAMP levels.
- Figure S2. FRET changes of the  $A^{2A}R^{FlAsH/CFP}$  in response to a full or an inverse agonist.
- Figure S3. Evaluation of energy transfer efficiency of the  $A_{2A}R^{FlAsH/CFP}$  biosensor.

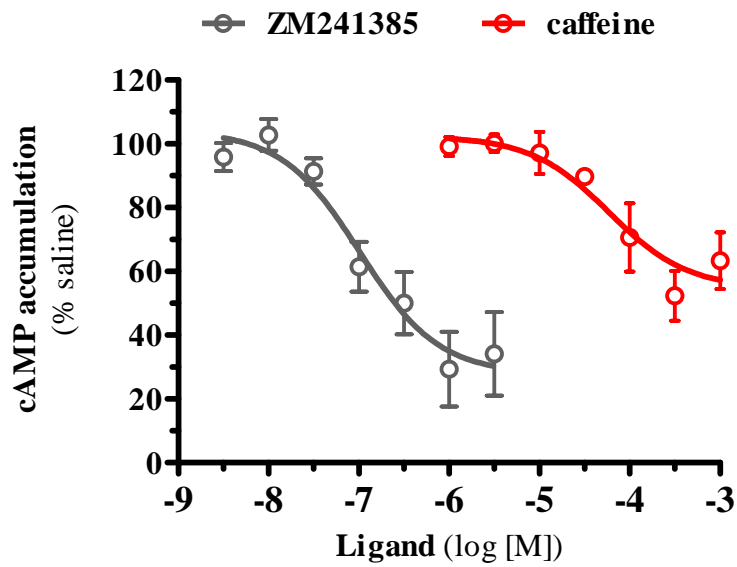

**Figure S1.** Dose-dependent effects of caffeine and ZM241385 in reducing cAMP levels. HEK293 cells expressing  $A_{2A}R$  were incubated with saline or increasing concentrations of caffeine or ZM241385. Saline-stimulated cAMP was set as 100%, and the maximum inhibitory response obtained with the prototypic inverse agonist ZM241385 was set to 0%. Data represent the mean  $\pm$  s.e.m. of three independent experiments.

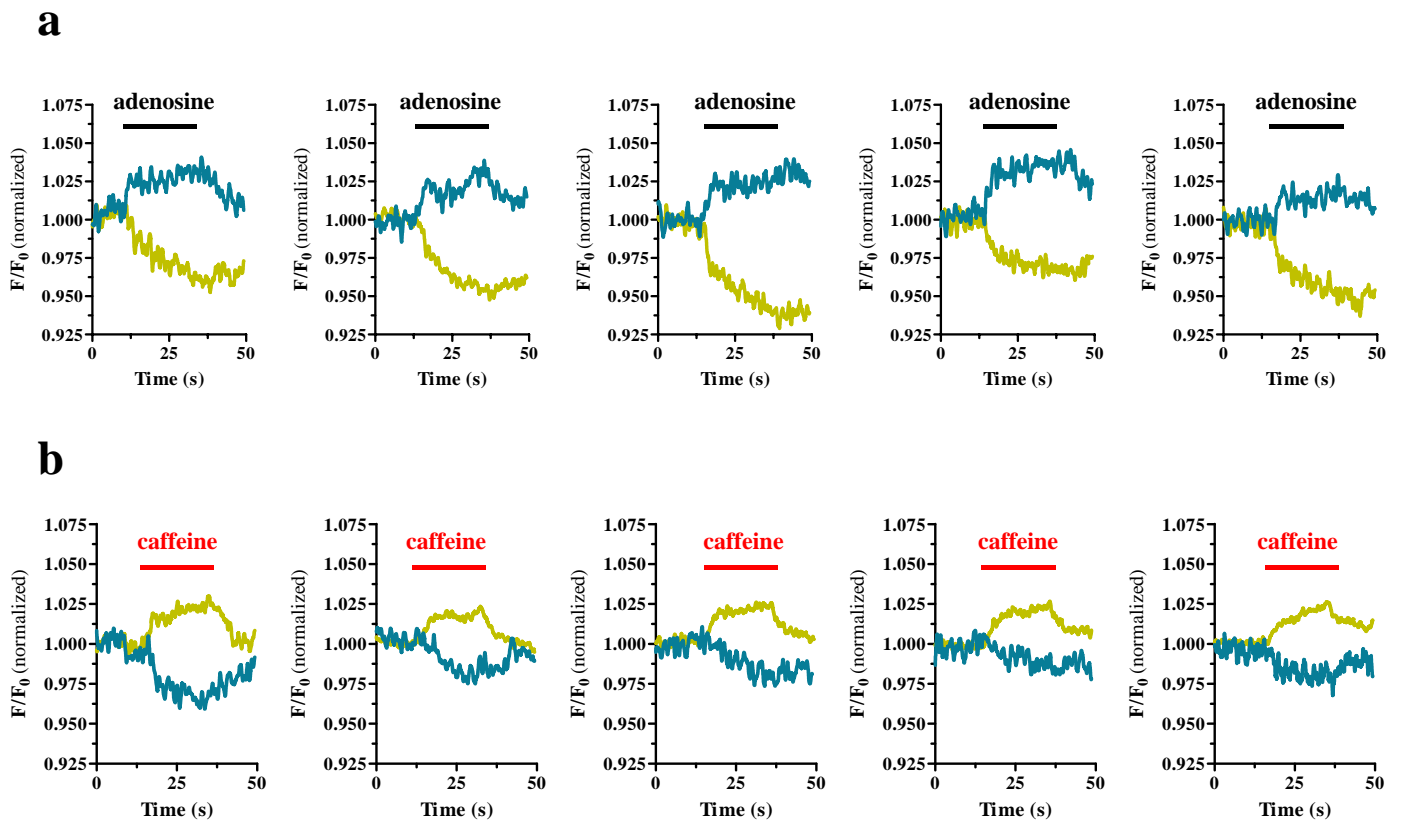

**Figure S2.** FRET changes of the  $A_{2A}R^{FIAsh/CFP}$  in response to a full or an inverse agonist. Shown are the changes on the FIAsh (FIAsh, yellow trace) and CFP (FCFP, blue trace) signals induced by rapid superfusion of (a) adenosine (100  $\mu$ M, black) or (b) caffeine (300  $\mu$ M, red).

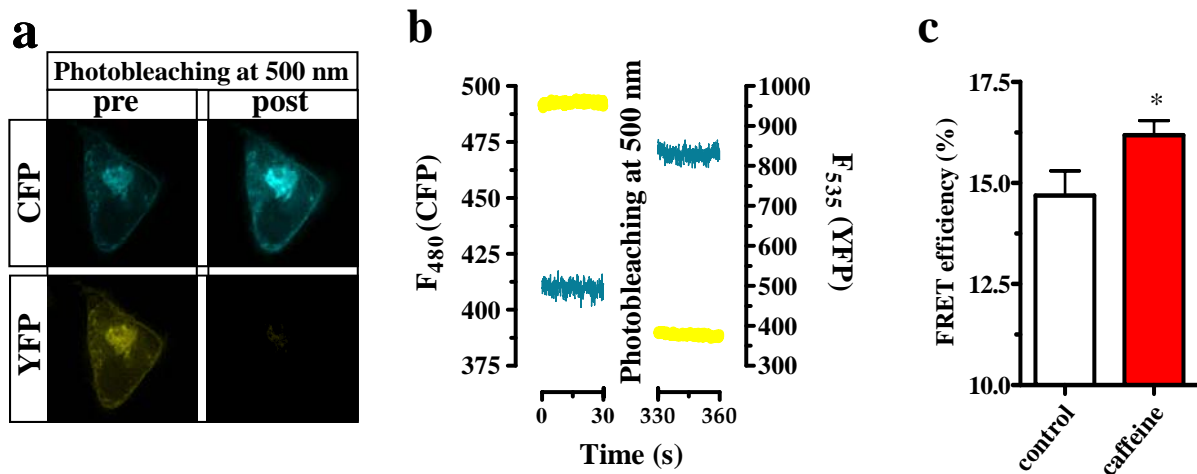

**Figure S3.** Evaluation of energy transfer efficiency of the  $A_{2A}R^{FIAsh/CFP}$  biosensor. (a) Fluorescence images and (b) Emission intensities of CFP (480 nm, blue) and FIAsh (535 nm, yellow) recorded before (pre) and after (post) FIAsh was photobleached by 5 min of exposure to light at 500 nm. Images and traces are representative of the experiments performed upon saline or caffeine continuous superfusion. Scale bar: 10  $\mu$ m. (c) Quantification of the FRET efficiency of the  $A_{2A}R^{FIAsh/CFP}$ , determined photobleaching FIAsh in the absence (saline) or the continuous superfusion of caffeine (300  $\mu$ M). Data indicate the mean  $\pm$  s.e.m. (saline, n=10; caffeine, n=11). An asterisk designates a significant difference between groups ( $P < 0.05$ ).
